# Supplementary material for: Search for Cryptococcus neoformans/gattii Complexes and Related Genera (Filobasidium, Holtermanniella, Naganishia, Papiliotrema, Solicoccozyma, Vishniacozyma) spp. Biotope: Two Years Surveillance of Wild Avian Fauna in Southern France
Source: MDPI journal article supplement (doi:10.3390/jof8030227), 2022-02-24
Supplement: s1 [file s1]

| Order           | Individual birds names    | Individual birds common names | Main feeding diet at adult stage | Total number of individuals sampled within the specie | Number of positive individuals within the specie |
|-----------------|---------------------------|-------------------------------|----------------------------------|-------------------------------------------------------|--------------------------------------------------|
| Accipitriformes | <i>Buteo buteo</i>        | Common buzzard                | Small vertebrates eater          | 43                                                    | <b>4 (9.3%)</b>                                  |
|                 | <i>Accipiter nisus</i>    | European sparrowhawk          | Other                            | 20                                                    | <b>1 (5%)</b>                                    |
|                 | <i>Aegypius monachus</i>  | Cinereous vulture             | Other                            | 1                                                     | <b>1 (100%)</b>                                  |
|                 | <i>Circaetus gallicus</i> | Short toed snake eagle        | Other                            | 2                                                     | <b>1 (50%)</b>                                   |
|                 | <i>Pernis apivorus</i>    | European honey buzzard        | Other                            | 1                                                     | <b>1 (100%)</b>                                  |
|                 | <i>Accipiter gentilis</i> | Goshawk                       | Small vertebrates eater          | 1                                                     | 0                                                |
|                 | <i>Aquila chrysaetos</i>  | Golden eagle                  | Other                            | 1                                                     | 0                                                |
|                 | <i>Circus aeruginosus</i> | Western marsh harrier         | Small vertebrates eater          | 1                                                     | 0                                                |
|                 | <i>Gypaetus barburus</i>  | Bearded vulture               | Other                            | 1                                                     | 0                                                |
|                 | <i>Gyps fulvus</i>        | Griffon vulture               | Other                            | 2                                                     | 0                                                |
|                 | <i>Hieraetus pennatus</i> | Booted eagle                  | Small vertebrates eater          | 1                                                     | 0                                                |
|                 | <i>Milvus migrans</i>     | Black kite                    | Small vertebrates eater          | 1                                                     | 0                                                |
| Anseriformes    | <i>Cygnus olor</i>        | Mute swan                     | Other                            | 2                                                     | <b>1 (50%)</b>                                   |
|                 | <i>Anas creca</i>         | Common teal                   | Other                            | 1                                                     | 0                                                |
|                 | <i>Anas platyrhynchos</i> | Mallard duck                  | Omnivorous                       | 12                                                    | 0                                                |

|                  |                                   |                                   |                                                |     |                   |
|------------------|-----------------------------------|-----------------------------------|------------------------------------------------|-----|-------------------|
|                  | <i>Tadorna tadorna</i>            | Common shelduck                   | Other                                          | 2   | 0                 |
| Apodiformes      | <i>Apus apus</i>                  | Common swift                      | Insectivorous                                  | 12  | <b>3 (25%)</b>    |
|                  | <i>Apus pallidus</i>              | Pallid swift                      | Insectivorous                                  | 2   | 0                 |
| Bucerotiformes   | <i>Upupa epops</i>                | Eurasian hoopoe                   | Insectivorous                                  | 8   | <b>1 (12.5%)</b>  |
| Caprimulgiformes | <i>Caprimulgus europaeus</i>      | Eurasian nightjar                 | Insectivorous                                  | 1   | 0                 |
| Charadriiformes  | <i>Larus michaelis</i>            | Yellow-legged gull                | Omnivorous, Opportunistic                      | 100 | <b>13 (13%)</b>   |
|                  | <i>Chroicocephalus ridibundus</i> | Black Headed gull                 | Omnivorous, Opportunistic                      | 10  | <b>1 (10%)</b>    |
|                  | <i>Scolopex rusticola</i>         | Eurasian woodcock                 | Other                                          | 2   | <b>1 (50%)</b>    |
|                  | <i>Burhinus oedienemus</i>        | Eurasian thick-knee/ stone-curlew | Other                                          | 1   | 0                 |
| Ciconiiformes    | <i>Ciconia ciconia</i>            | White stork                       | Other                                          | 3   | <b>1 (33.3%)</b>  |
|                  | <i>Egretta garzetta</i>           | Little egret                      | Other                                          | 2   | 0                 |
| Columbiformes    | <i>Streptopelia decaocto</i>      | Eurasian collared dove            | Grain eater                                    | 127 | <b>20 (15.7%)</b> |
|                  | <i>Columba palumbus</i>           | Common wood pigeon                | Grain eater, fruit eater                       | 27  | <b>9 (33.3%)</b>  |
|                  | <i>Columba livia</i>              | Common pigeon/ rock pigeon        | Grain eater, fruit eater, Opportunistic feeder | 23  | <b>4 (17.4%)</b>  |
|                  | <i>Columba livia domestica</i>    | Common pigeon/ rock pigeon        | Grain eater, fruit eater, Opportunistic feeder | 1   | 0                 |

|               |                            |                      |                                           |    |                  |
|---------------|----------------------------|----------------------|-------------------------------------------|----|------------------|
|               | <i>Columba sp</i>          | XXX                  | Grain eater, fruit eater                  | 2  | 0                |
| Coraciiformes | <i>Alcedo atthis</i>       | Common kingfisher    | Other                                     | 3  | 0                |
|               | <i>Merops apiaster</i>     | European bee eater   | Insectivorous                             | 1  | 0                |
| Cuculiformes  | <i>Clamator glandarius</i> | Great spotted cuckoo | Insectivorous                             | 4  | 0                |
| Falconiformes | <i>Falco tinnunculus</i>   | Common kestrel       | Small vertebrates eater                   | 25 | <b>7 (28%)</b>   |
|               | <i>Falco naumanni</i>      | Lesser kestrel       | Small vertebrates eater,<br>Insectivorous | 4  | <b>2 (50%)</b>   |
|               | <i>Falco peregrinus</i>    | Peregrine falcon     | Other                                     | 1  | 0                |
|               | <i>Falco subbuteo</i>      | Eurasian hobby       | Other                                     | 2  | 0                |
| Galliformes   | <i>Phasianus colchicus</i> | Common pheasant      | Omnivorous                                | 1  | <b>1 (100%)</b>  |
|               | <i>Alectoris rufa</i>      | Red-legged partridge | Grain eater                               | 5  | 0                |
|               | <i>Coturnix coturnix</i>   | Common quail         | Omnivorous                                | 2  | 0                |
| Otidiformes   | <i>Tetrax tetrax</i>       | Little bustard       | Omnivorous                                | 1  | <b>1 (100%)</b>  |
| Passeriformes | <i>Sturnus vulgaris</i>    | Common starling      | Insectivorous                             | 22 | <b>5 (22.7%)</b> |
|               | <i>Turdus philomelos</i>   | Song thrush          | Omnivorous                                | 10 | <b>4 (40%)</b>   |
|               | <i>Passer domesticus</i>   | House sparrow        | Omnivorous, Opportunistic                 | 19 | <b>3 (15.8%)</b> |
|               | <i>Coeloeus monedula</i>   | Eurasian jackdaw     | Omnivorous, Opportunistic                 | 16 | <b>2 (12.5%)</b> |

|  |                                      |                     |                            |    |                  |
|--|--------------------------------------|---------------------|----------------------------|----|------------------|
|  | <i>Fringilla coelops</i>             | Common chaffinch    | Grain eater, Other         | 6  | <b>2 (33.3%)</b> |
|  | <i>Phoenicurus ochruros</i>          | Black redstart      | Insectivorous              | 4  | <b>2 (50%)</b>   |
|  | <i>Pica pica</i>                     | Eurasian magpie     | Omnivorous                 | 24 | <b>2 (8.3%)</b>  |
|  | <i>Sylvia melanocephala</i>          | Sardinian warbler   | Insectivorous, fruit eater | 3  | <b>2 (66.6%)</b> |
|  | <i>Carduelis carduelis</i>           | European goldfinch  | Grain eater                | 4  | <b>1 (25%)</b>   |
|  | <i>Spinus spinus</i>                 | Eurasian siskin     | Grain eater                | 2  | <b>1 (50%)</b>   |
|  | <i>Sylvia atricapilla</i>            | Eurasian blackcap   | Insectivorous, fruit eater | 5  | <b>1 (20%)</b>   |
|  | <i>Troglodytes troglodytes</i>       | Eurasian wren       | Insectivorous              | 1  | <b>1 (100%)</b>  |
|  | <i>Turdus merula</i>                 | Common blackbird    | Insectivorous, fruit eater | 2  | <b>1 (50%)</b>   |
|  | <i>Chloris chloris</i>               | European greenfinch | Grain eater, fruit eater   | 2  | 0                |
|  | <i>Coccothraustes coccothraustes</i> | Hawfinch            | Grain eater, fruit eater   | 4  | 0                |
|  | <i>Corvus corone</i>                 | Carrion crow        | Omnivorous                 | 1  | 0                |
|  | <i>Cyaniste caeruleus</i>            | Eurasian blue tit   | Insectivorous              | 2  | 0                |
|  | <i>Delichon urbica</i>               | Common House martin | Insectivorous              | 4  | 0                |
|  | <i>Emberiza cirrus</i>               | Cirl bunting        | Grain eater                | 1  | 0                |
|  | <i>Erithacus rubecula</i>            | European robin      | Insectivorous              | 3  | 0                |

|                |                                |                          |                            |   |                |
|----------------|--------------------------------|--------------------------|----------------------------|---|----------------|
|                | <i>Ficedula hypoleuca</i>      | European pied flycatcher | Insectivorous              | 2 | 0              |
|                | <i>Garrulus glandarius</i>     | Eurasian jay             | Omnivorous                 | 1 | 0              |
|                | <i>Hirundo rustica</i>         | Barn swallow             | Insectivorous              | 1 | 0              |
|                | <i>Loxia curvirostra</i>       | Red crossbill            | Other                      | 1 | 0              |
|                | <i>Parus major</i>             | Eurasian great tit       | Omnivorous                 | 3 | 0              |
|                | <i>Passer monatus</i>          | Tree sparrow             | Omnivorous                 | 1 | 0              |
|                | <i>Petronia petronia</i>       | Rock sparrow             | Grain eater, fruit eater   | 1 | 0              |
|                | <i>Phoenicurus phoenicurus</i> | Common redstart          | Insectivorous              | 1 | 0              |
|                | <i>Phylloscopus collybita</i>  | Common chiffchaff        | Insectivorous              | 1 | 0              |
|                | <i>Phylloscopus trochilus</i>  | Willow warbler           | Insectivorous              | 1 | 0              |
|                | <i>Serinus serinus</i>         | European serin           | Grain eater                | 2 | 0              |
|                | <i>Sylvia cantillans</i>       | Subalpine warbler        | Insectivorous, fruit eater | 1 | 0              |
|                | <i>Sylvia undata</i>           | Dartford warbler         | Insectivorous              | 1 | 0              |
|                | <i>Taeniopygia guttata</i>     | Zebra finch              | Grain eater, Insectivorous | 1 | 0              |
| Pelecaniformes | <i>Ardea cinerea</i>           | Grey heron               | Other                      | 5 | <b>3 (60%)</b> |
|                | <i>Bulbulcus ibis</i>          | Cattle egret             | Insectivorous              | 2 | 0              |

|                     |                               |                     |                         |    |                  |
|---------------------|-------------------------------|---------------------|-------------------------|----|------------------|
| Phoenicopteriformes | <i>Phoenicopiterus roseus</i> | Greater flamingo    | Other                   | 6  | <b>1 (16.6%)</b> |
| Podicipediformes    | <i>Podiceps cristatus</i>     | Great crested grebe | Other                   | 2  | 0                |
| Strigiformes        | <i>Otus scops</i>             | European scops owl  | Small vertebrates eater | 6  | <b>1 (16.6%)</b> |
|                     | <i>Tyto alba</i>              | Barn owl            | Small vertebrates eater | 3  | <b>1 (33.3%)</b> |
|                     | <i>Aegolius funereus</i>      | Boreal owl          | Small vertebrates eater | 1  | 0                |
|                     | <i>Asio flammeus</i>          | Short-eared owl     | Small vertebrates eater | 1  | 0                |
|                     | <i>Asio otus</i>              | Long-eared owl      | Small vertebrates eater | 2  | 0                |
|                     | <i>Athene noctua</i>          | Little owl          | Small vertebrates eater | 2  | 0                |
|                     | <i>Bubo bubo</i>              | Eurasian eagle-owl  | Small vertebrates eater | 4  | 0                |
|                     | <i>Strix aluco</i>            | Tawny owl           | Small vertebrates eater | 14 | 0                |
| Suliformes          | <i>Phalacrocorax carbo</i>    | Great cormoran      | Other                   | 3  | <b>1 (33.3%)</b> |
|                     | <i>Morus basanus</i>          | Gannet              | Other                   | 3  | 0                |

Supplementary Data S2: Complete list of birds Orders and species sampled during the study and number of individuals positive to rare *Cryptococcus* and former *Cryptococcus* (RCFC) within each specie

Meaning of main diet column categories :

Grain eaters indicates birds feeding mainly on grain and/or seeds at adult stage;

Fruit eaters indicates birds feeding mainly on fruit and/or berries at adult stage;

Small vertebrate eaters indicates birds feeding on a variety of small terrestrial vertebrate preys such as mice, voles, small reptiles and small birds at adult stage;

Insectivorous indicates birds feeding on a wide variety of insects and other terrestrial arthropods such as spiders at adult stage;

Omnivorous indicates birds with no preferential diet between plants/grain and animals;

Opportunistic indicates birds with a wide variety of food sources that also scavenge on human wastes;

Other group indicates birds with a diet that does not fit into any of the previous groups. This includes specialist feeders, birds feeding on invertebrates other than insects such as annelids, molluscs or crustaceans, birds feeding on aquatic food sources such as fishes or amphibians, carrion eaters....
