# Supplementary material for: Search for Cryptococcus neoformans/gattii Complexes and Related Genera (Filobasidium, Holtermanniella, Naganishia, Papiliotrema, Solicoccozyma, Vishniacozyma) spp. Biotope: Two Years Surveillance of Wild Avian Fauna in Southern France
Source: MDPI journal article supplement (doi:10.3390/jof8030227), 2022-02-24
Supplement: s1 [file s1]

| Order          | Animal sampled            | Stage | Clinical datas                                   | Method of sampling         | Cryptococcal species isolated (actual name)                       | Cryptococcal species isolated (ancient name)       | Primers used for sequencing |
|----------------|---------------------------|-------|--------------------------------------------------|----------------------------|-------------------------------------------------------------------|----------------------------------------------------|-----------------------------|
| Accipitriforme | <i>Accipiter nisus</i>    | A     | Amoxicillin + clavulanate + meloxicam            | Swab on cage wet droppings | <i>Filobasidium magnum</i>                                        | <i>Cryptococcus magnus</i>                         | ITS                         |
|                | <i>Aegypius monachus</i>  | A     | ND                                               | Swab on cage dry droppings | <i>Naganishia albida</i>                                          | <i>Cryptococcus kuetzingii</i>                     | NL                          |
|                | <i>Buteo buteo</i>        | A     | ND                                               | Direct cloacal swab        | <i>Filobasidium wieringae</i>                                     | <i>Cryptococcus wieringae</i>                      | ITS                         |
|                | <i>Buteo buteo</i>        | A     | Wounded by lead pellets                          | Direct cloacal swab        | <i>Naganishia albida</i>                                          | <i>Cryptococcus albidus</i>                        | NL                          |
|                | <i>Buteo buteo</i>        | A     | ND                                               | Swab on cage dry droppings | <i>Filobasidium oeirensae</i>                                     | <i>Cryptococcus oeirensis</i>                      | ITS                         |
|                | <i>Buteo buteo</i>        | A     | ND                                               | Swab on cage dry droppings | <i>Naganishia uzbekistanensis</i>                                 | <i>Cryptococcus uzbekistanensis</i>                | ITS                         |
|                | <i>Circaetus gallicus</i> | A     | Wounded by lead pellets, amoxicillin + meloxicam | Swab on cage wet droppings | <i>Naganishia diffluens</i>                                       | <i>Cryptococcus diffluens</i>                      | ITS                         |
|                | <i>Pernis apivorus</i>    | A     | Wounded by lead pellets                          | Direct cloacal swab        | <i>Vishniacozyma carnescens</i>                                   | <i>Cryptococcus carnescens</i>                     | ITS                         |
| Anseriforme    | <i>Cygnus olor</i>        | J     | Botulism, activated coal + rehydration           | Swab on cage wet droppings | <i>Vishniacozyma carnescens</i>                                   | <i>Cryptococcus carnescens</i>                     | ITS                         |
| Apodiforme     | <i>Apus apus</i>          | A     | ND                                               | Swab on cage dry droppings | <i>Cutaneotrichosporon curvatus</i> + <i>Naganishia diffluens</i> | <i>Cryptococcus curvatus</i> + <i>C. diffluens</i> | ITS<br>ITS                  |

|                |                                   |          |                                                        |                            |                                     |                                     |     |
|----------------|-----------------------------------|----------|--------------------------------------------------------|----------------------------|-------------------------------------|-------------------------------------|-----|
|                | <i>Apus apus</i>                  | <b>A</b> | ND                                                     | Swab on cage wet droppings | <i>Filobasidium magnum</i>          | <i>Cryptococcus magnus</i>          | ITS |
|                | <i>Apus apus</i>                  | <b>A</b> | ND                                                     | Swab on cage wet droppings | <i>Filobasidium magnum</i>          | <i>Cryptococcus magnus</i>          | ITS |
| Bucerotiforme  | <i>Upupa epops</i>                | <b>A</b> | ND                                                     | Direct cloacal swab        | <i>Naganishia diffluens</i>         | <i>Cryptococcus diffluens</i>       | ITS |
| Charadriiforme | <i>Chroicocephalus ridibundus</i> | <b>J</b> | Coccidiosis                                            | Swab on cage wet droppings | <i>Filobasidium floriforme</i>      | <i>Cryptococcus albidus</i>         | NL  |
|                | <i>Larus michaelis</i>            | <b>A</b> | ND                                                     | Direct cloacal swab        | <i>Filobasidium magnum</i>          | <i>Cryptococcus magnus</i>          | ITS |
|                | <i>Larus michaelis</i>            | <b>J</b> | ND                                                     | Direct cloacal swab        | <i>Naganishia randhawai</i>         | <i>Cryptococcus randhawai</i>       | ITS |
|                | <i>Larus michaelis</i>            | <b>A</b> | ND                                                     | Swab on cage dry droppings | <i>Naganishia globosa</i>           | <i>Cryptococcus saitoi</i>          | ITS |
|                | <i>Larus michaelis</i>            | <b>A</b> | ND                                                     | Swab on cage dry droppings | <i>Naganishia uzbekistanensis</i>   | <i>Cryptococcus uzbekistanensis</i> | ITS |
|                | <i>Larus michaelis</i>            | <b>A</b> | ND                                                     | Swab on cage wet droppings | <i>Cryptococcus ovalis</i>          | <i>Cryptococcus ovalis</i>          | ITS |
|                | <i>Larus michaelis</i>            | <b>A</b> | ND                                                     | Swab on cage wet droppings | <i>Cutaneotrichosporon curvatus</i> | <i>Cryptococcus curvatus</i>        | ITS |
|                | <i>Larus michaelis</i>            | <b>A</b> | Thiamine-Pyridoxine + Vincamine-papaverine + Rapidexon | Swab on cage wet droppings | <i>Filobasidium magnum</i>          | <i>Cryptococcus magnus</i>          | ITS |
|                | <i>Larus michaelis</i>            | <b>I</b> | ND                                                     | Swab on cage wet droppings | <i>Filobasidium magnum</i>          | <i>Cryptococcus magnus</i>          | ITS |

|              |                          |          |                           |                            |                                   |                                     |     |
|--------------|--------------------------|----------|---------------------------|----------------------------|-----------------------------------|-------------------------------------|-----|
|              | <i>Larus michaelis</i>   | <b>A</b> | ND                        | Swab on cage wet droppings | <i>Naganishia albida</i>          | <i>Cryptococcus albidus</i>         | NL  |
|              | <i>Larus michaelis</i>   | <b>A</b> | Avian pox                 | Swab on cage wet droppings | <i>Naganishia diffluens</i>       | <i>Cryptococcus diffluens</i>       | ITS |
|              | <i>Larus michaelis</i>   | <b>A</b> | ND                        | Swab on cage wet droppings | <i>Papiliotrema laurentii</i>     | <i>Cryptococcus laurentii</i>       | ITS |
|              | <i>Larus michaelis</i>   | <b>A</b> | ND                        | Swab on cage wet droppings | <i>Vishniacozyma carnescens</i>   | <i>Cryptococcus carnescens</i>      | ITS |
|              | <i>Larus michaelis</i>   | <b>A</b> | Amoxicillin + clavulanate | Swab on cage wet droppings | <i>Vishniacozyma carnescens</i>   | <i>Cryptococcus carnescens</i>      | ITS |
|              | <i>Scolopax rusicola</i> | <b>A</b> | ND                        | Direct cloacal swab        | <i>Naganishia uzbekistanensis</i> | <i>Cryptococcus uzbekistanensis</i> | ITS |
| Ciconiforme  | <i>Ciconia ciconia</i>   | <b>A</b> | Electrocution             | Direct cloacal swab        | <i>Naganishia liquefasciens</i>   | <i>Cryptococcus liquefasciens</i>   | ITS |
| Columbiforme | <i>Columba livia</i>     | <b>A</b> | Wounded by lead pellets   | Direct cloacal swab        | <i>Cryptococcus ovalis</i>        | <i>Cryptococcus ovalis</i>          | ITS |
|              | <i>Columba livia</i>     | <b>A</b> | ND                        | Swab on cage wet droppings | <i>Filobasidium magnum</i>        | <i>Cryptococcus magnus</i>          | ITS |
|              | <i>Columba livia</i>     | <b>A</b> | ND                        | Swab on cage wet droppings | <i>Naganishia albida</i>          | <i>Cryptococcus kuetzingii</i>      | NL  |
|              | <i>Columba livia</i>     | <b>J</b> | ND                        | Swab on cage wet droppings | <i>Naganishia uzbekistanensis</i> | <i>Cryptococcus uzbekistanensis</i> | ITS |
|              | <i>Columba palumbus</i>  | <b>A</b> | ND                        | Swab on cage dry droppings | <i>Filobasidium magnum</i>        | <i>Cryptococcus magnus</i>          | ITS |

|  |                              |          |                            |                            |                                                              |                                                   |     |
|--|------------------------------|----------|----------------------------|----------------------------|--------------------------------------------------------------|---------------------------------------------------|-----|
|  | <i>Columba palumbus</i>      | <b>A</b> | ND                         | Swab on cage dry droppings | <i>Papiliotrema laurentii</i>                                | <i>Cryptococcus laurentii</i>                     | ITS |
|  | <i>Columba palumbus</i>      | <b>A</b> | ND                         | Swab on cage wet droppings | <i>Filobasidium magnum</i>                                   | <i>Cryptococcus magnus</i>                        | ITS |
|  | <i>Columba palumbus</i>      | <b>A</b> | ND                         | Swab on cage wet droppings | <i>Filobasidium magnum</i>                                   | <i>Cryptococcus magnus</i>                        | ITS |
|  | <i>Columba palumbus</i>      | <b>A</b> | ND                         | Swab on cage wet droppings | <i>Filobasidium magnum</i>                                   | <i>Cryptococcus magnus</i>                        | ITS |
|  | <i>Columba palumbus</i>      | <b>A</b> | ND                         | Swab on cage wet droppings | <i>Filobasidium magnum</i>                                   | <i>Cryptococcus magnus</i>                        | ITS |
|  | <i>Columba palumbus</i>      | <b>J</b> | ND                         | Swab on cage wet droppings | <i>Naganishia adeliensis</i>                                 | <i>Cryptococcus adeliensis</i>                    | ITS |
|  | <i>Columba palumbus</i>      | <b>A</b> | ND                         | Swab on cage wet droppings | <i>Naganishia diffluens</i>                                  | <i>Cryptococcus diffluens</i>                     | ITS |
|  | <i>Columba palumbus</i>      | <b>J</b> | Possible Newcastle disease | Swab on cage wet droppings | <i>Vishniacozyma carnescens</i>                              | <i>Cryptococcus carnescens</i>                    | ITS |
|  | <i>Streptopelia decaocto</i> | <b>A</b> | ND                         | Direct cloacal swab        | <i>Filobasidium magnum</i>                                   | <i>Cryptococcus magnus</i>                        | ITS |
|  | <i>Streptopelia decaocto</i> | <b>A</b> | ND                         | Direct cloacal swab        | <i>Solicoccozyma aerea</i> + <i>Vishniacozyma carnescens</i> | <i>Cryptococcus aerius</i> + <i>C. carnescens</i> | ITS |
|  | <i>Streptopelia decaocto</i> | <b>A</b> | ND                         | Swab on cage dry droppings | <i>Filobasidium floriforme</i>                               | <i>Cryptococcus albidus</i>                       | NL  |

|  |                              |          |                                 |                            |                                                        |                                             |                     |
|--|------------------------------|----------|---------------------------------|----------------------------|--------------------------------------------------------|---------------------------------------------|---------------------|
|  | <i>Streptopelia decaocto</i> | <b>A</b> | Rapidexon+ meloxicam+etamsylate | Swab on cage dry droppings | <i>Naganishia albida</i>                               | <i>Cryptococcus albidus</i>                 | NL                  |
|  | <i>Streptopelia decaocto</i> | <b>A</b> | ND                              | Swab on cage dry droppings | <i>Naganishia albida</i>                               | <i>Cryptococcus albidus</i>                 | NL                  |
|  | <i>Streptopelia decaocto</i> | <b>A</b> | ND                              | Swab on cage dry droppings | <i>Naganishia albida</i>                               | <i>Cryptococcus albidus</i>                 | NL                  |
|  | <i>Streptopelia decaocto</i> | <b>A</b> | ND                              | Swab on cage wet droppings | <i>Cryptococcus sp +</i><br><i>Filobasidium magnum</i> | <i>Cryptococcus sp</i><br><i>+ C.magnus</i> | ITS and NL +<br>ITS |
|  | <i>Streptopelia decaocto</i> | <b>A</b> | Possible Newcastle disease      | Swab on cage wet droppings | <i>Filobasidium floriforme</i>                         | <i>Cryptococcus albidus</i>                 | NL                  |
|  | <i>Streptopelia decaocto</i> | <b>A</b> | ND                              | Swab on cage wet droppings | <i>Filobasidium magnum</i>                             | <i>Cryptococcus magnus</i>                  | ITS                 |
|  | <i>Streptopelia decaocto</i> | <b>A</b> | ND                              | Swab on cage wet droppings | <i>Filobasidium magnum</i>                             | <i>Cryptococcus magnus</i>                  | ITS                 |
|  | <i>Streptopelia decaocto</i> | <b>I</b> | ND                              | Swab on cage wet droppings | <i>Filobasidium magnum</i>                             | <i>Cryptococcus magnus</i>                  | ITS                 |
|  | <i>Streptopelia decaocto</i> | <b>A</b> | ND                              | Swab on cage wet droppings | <i>Filobasidium magnum</i>                             | <i>Cryptococcus magnus</i>                  | ITS                 |
|  | <i>Streptopelia decaocto</i> | <b>I</b> | ND                              | Swab on cage wet droppings | <i>Filobasidium magnum</i>                             | <i>Cryptococcus magnus</i>                  | ITS                 |
|  | <i>Streptopelia decaocto</i> | <b>A</b> | ND                              | Swab on cage wet droppings | <i>Filobasidium magnum</i>                             | <i>Cryptococcus magnus</i>                  | ITS                 |

|              |                              |          |                                       |                            |                                                           |                                                    |           |
|--------------|------------------------------|----------|---------------------------------------|----------------------------|-----------------------------------------------------------|----------------------------------------------------|-----------|
|              | <i>Streptopelia decaocto</i> | <b>A</b> | Amoxicillin + clavulanate + meloxicam | Swab on cage wet droppings | <i>Filobasidium magnum</i> + <i>Naganishia albida</i>     | <i>Cryptococcus magnus</i> + <i>C. albidus</i>     | ITS<br>NL |
|              | <i>Streptopelia decaocto</i> | <b>A</b> | ND                                    | Swab on cage wet droppings | <i>Naganishia albida</i> + <i>Papiliotrema flavescens</i> | <i>Cryptococcus albidus</i> + <i>C. flavescens</i> | NL<br>NL  |
|              | <i>Streptopelia decaocto</i> | <b>A</b> | ND                                    | Swab on cage wet droppings | <i>Naganishia diffluens</i>                               | <i>Cryptococcus diffluens</i>                      | ITS       |
|              | <i>Streptopelia decaocto</i> | <b>A</b> | ND                                    | Swab on cage wet droppings | <i>Naganishia globosa</i>                                 | <i>Cryptococcus saitoi</i>                         | ITS       |
|              | <i>Streptopelia decaocto</i> | <b>A</b> | ND                                    | Swab on cage wet droppings | <i>Naganishia globosa</i>                                 | <i>Cryptococcus saitoi</i>                         | ITS       |
|              | <i>Streptopelia decaocto</i> | <b>A</b> | ND                                    | Swab on cage wet droppings | <i>Naganishia uzbekistanensis</i>                         | <i>Cryptococcus uzbekistanensis</i>                | ITS       |
| Falconiforme | <i>Falco naumanni</i>        | <b>A</b> | Meloxicam                             | Direct cloacal swab        | <i>Naganishia albida</i>                                  | <i>Cryptococcus albidus</i>                        | NL        |
|              | <i>Falco naumanni</i>        | <b>A</b> | Meloxicam                             | Swab on cage wet droppings | <i>Filobasidium magnum</i>                                | <i>Cryptococcus magnus</i>                         | ITS       |
|              | <i>Falco tinnunculus</i>     | <b>I</b> | ND                                    | Direct cloacal swab        | <i>Filobasidium oeirensense</i>                           | <i>Cryptococcus oeirensis</i>                      | ITS       |
|              | <i>Falco tinnunculus</i>     | <b>A</b> | ND                                    | Swab on cage dry droppings | <i>Filobasidium magnum</i>                                | <i>Cryptococcus magnus</i>                         | ITS       |
|              | <i>Falco tinnunculus</i>     | <b>A</b> | ND                                    | Swab on cage dry droppings | <i>Naganishia albida</i>                                  | <i>Cryptococcus kuetzingii</i>                     | NL        |

|              |                            |          |                                       |                            |                                                                     |                                                              |            |
|--------------|----------------------------|----------|---------------------------------------|----------------------------|---------------------------------------------------------------------|--------------------------------------------------------------|------------|
|              | <i>Falco tinnunculus</i>   | <b>A</b> | Meloxicam                             | Swab on cage dry droppings | <i>Naganishia diffluens</i>                                         | <i>Cryptococcus diffluens</i>                                | ITS        |
|              | <i>Falco tinnunculus</i>   | <b>A</b> | Amoxicillin + clavulanate + meloxicam | Swab on cage dry droppings | <i>Naganishia diffluens</i> + <i>Cutaneotrichosporon curvatus</i>   | <i>Cryptococcus diffluens</i> + <i>Cryptococcus curvatus</i> | ITS<br>ITS |
|              | <i>Falco tinnunculus</i>   | <b>A</b> | ND                                    | Swab on cage dry droppings | <i>Naganishia uzbekistanensis</i>                                   | <i>Cryptococcus uzbekistanensis</i>                          | ITS        |
|              | <i>Falco tinnunculus</i>   | <b>A</b> | ND                                    | Swab on cage wet droppings | <i>Naganishia albida</i>                                            | <i>Cryptococcus albidus</i>                                  | NL         |
| Galliforme   | <i>Phasianus colchicus</i> | <b>A</b> | ND                                    | Swab on cage dry droppings | <i>Filobasidium magnum</i>                                          | <i>Cryptococcus magnus</i>                                   | ITS        |
| Otidiforme   | <i>Tetrax tetrax</i>       | <b>A</b> | Wounded by lead pellets               | Swab on cage wet droppings | <i>Naganishia globosa</i>                                           | <i>Cryptococcus saitoi</i>                                   | ITS        |
| Passeriforme | <i>Carduelis carduelis</i> | <b>A</b> | ND                                    | Swab on cage wet droppings | <i>Holtermanniella festucosa</i>                                    | <i>Cryptococcus festucosus</i>                               | ITS        |
|              | <i>Coloeus monedula</i>    | <b>A</b> | ND                                    | Swab on cage wet droppings | <i>Naganishia diffluens</i>                                         | <i>Cryptococcus diffluens</i>                                | ITS        |
|              | <i>Coloeus monedula</i>    | <b>A</b> | ND                                    | Swab on cage wet droppings | <i>Vishniacozyma carnescens</i> + <i>Naganishia uzbekistanensis</i> | <i>Cryptococcus carnescens</i> + <i>C. uzbekistanensis</i>   | ITS<br>ITS |
|              | <i>Fringilla coelebs</i>   | <b>A</b> | Rapidexon                             | Swab on cage dry droppings | <i>Filobasidium magnum</i>                                          | <i>Cryptococcus magnus</i>                                   | ITS        |
|              | <i>Fringilla coelebs</i>   | <b>A</b> | ND                                    | Swab on cage wet droppings | <i>Filobasidium magnum</i>                                          | <i>Cryptococcus magnus</i>                                   | ITS        |

|  |                             |          |           |                            |                                 |                                   |     |
|--|-----------------------------|----------|-----------|----------------------------|---------------------------------|-----------------------------------|-----|
|  | <i>Passer domesticus</i>    | <b>A</b> | ND        | Swab on cage dry droppings | <i>Filobasidium magnum</i>      | <i>Cryptococcus magnus</i>        | ITS |
|  | <i>Passer domesticus</i>    | <b>A</b> | ND        | Swab on cage dry droppings | <i>Filobasidium magnum</i>      | <i>Cryptococcus magnus</i>        | ITS |
|  | <i>Passer domesticus</i>    | <b>A</b> | ND        | Swab on cage wet droppings | <i>Naganishia liquefasciens</i> | <i>Cryptococcus liquefasciens</i> | ITS |
|  | <i>Phoenicurus ochruros</i> | <b>J</b> | ND        | Direct cloacal swab        | <i>Filobasidium chernovii</i>   | <i>Cryptococcus chernovii</i>     | ITS |
|  | <i>Phoenicurus ochruros</i> | <b>A</b> | Meloxicam | Swab on cage wet droppings | <i>Filobasidium magnum</i>      | <i>Cryptococcus magnus</i>        | ITS |
|  | <i>Pica pica</i>            | <b>A</b> | ND        | Swab on cage dry droppings | <i>Naganishia albida</i>        | <i>Cryptococcus kuetzingii</i>    | NL  |
|  | <i>Pica pica</i>            | <b>J</b> | ND        | Swab on cage wet droppings | <i>Naganishia diffluens</i>     | <i>Cryptococcus diffluens</i>     | ITS |
|  | <i>Spinus spinus</i>        | <b>A</b> | ND        | Swab on cage wet droppings | <i>Filobasidium magnum</i>      | <i>Cryptococcus magnus</i>        | ITS |
|  | <i>Sturnus vulgaris</i>     | <b>A</b> | ND        | Direct cloacal swab        | <i>Filobasidium magnum</i>      | <i>Cryptococcus magnus</i>        | ITS |
|  | <i>Sturnus vulgaris</i>     | <b>A</b> | ND        | Swab on cage wet droppings | <i>Filobasidium magnum</i>      | <i>Cryptococcus magnus</i>        | ITS |
|  | <i>Sturnus vulgaris</i>     | <b>A</b> | ND        | Swab on cage wet droppings | <i>Filobasidium magnum</i>      | <i>Cryptococcus magnus</i>        | ITS |
|  | <i>Sturnus vulgaris</i>     | <b>A</b> | ND        | Swab on cage wet droppings | <i>Papiliotrema flavescens</i>  | <i>Cryptococcus flavescens</i>    | ITS |



|  |                                |          |    |                            |                                                       |                                                    |           |
|--|--------------------------------|----------|----|----------------------------|-------------------------------------------------------|----------------------------------------------------|-----------|
|  | <i>Sturnus vulgaris</i>        | <b>A</b> | ND | Swab on cage wet droppings | <i>Papiliotrema laurentii</i>                         | <i>Cryptococcus laurentii</i>                      | ITS       |
|  | <i>Sylvia atricapilla</i>      | <b>A</b> | ND | Swab on cage dry droppings | <i>Naganishia globosa</i>                             | <i>Cryptococcus saitoi</i>                         | ITS       |
|  | <i>Sylvia melanocephala</i>    | <b>A</b> | ND | Direct cloacal swab        | <i>Papiliotrema flavescens</i> + <i>N. albida</i>     | <i>Cryptococcus flavescens</i> + <i>C. albidus</i> | ITS<br>NL |
|  | <i>Sylvia melanocephala</i>    | <b>A</b> | ND | Swab on cage dry droppings | <i>Naganishia albida</i>                              | <i>Cryptococcus albidus</i>                        | NL        |
|  | <i>Troglodytes troglodytes</i> | <b>I</b> | ND | Swab on cage wet droppings | <i>Vishniacozyma carnescens</i>                       | <i>Cryptococcus carnescens</i>                     | ITS       |
|  | <i>Turdus merula</i>           | <b>A</b> | ND | Swab on cage wet droppings | <i>Papiliotrema terrestris</i>                        | <i>Cryptococcus terrestris</i>                     | ITS       |
|  | <i>Turdus philomelos</i>       | <b>A</b> | ND | Direct cloacal swab        | <i>Solicoccozyma aerea</i>                            | <i>Cryptococcus aerius</i>                         | ITS       |
|  | <i>Turdus philomelos</i>       | <b>A</b> | ND | Swab on cage dry droppings | <i>Filobasidium magnum</i>                            | <i>Cryptococcus magnus</i>                         | ITS       |
|  | <i>Turdus philomelos</i>       | <b>A</b> | ND | Swab on cage dry droppings | <i>Filobasidium magnum</i> + <i>Naganishia albida</i> | <i>Cryptococcus magnus</i> + <i>C. albidus</i>     | ITS<br>NL |
|  | <i>Turdus philomelos</i>       | <b>A</b> | ND | Swab on cage wet droppings | <i>Papiliotrema terrestris</i>                        | <i>Cryptococcus terrestris</i>                     | ITS       |

|                  |                              |          |                                       |                            |                                   |                                     |     |
|------------------|------------------------------|----------|---------------------------------------|----------------------------|-----------------------------------|-------------------------------------|-----|
| Pelecaniforme    | <i>Ardea cinerea</i>         | <b>A</b> | ND                                    | Swab on cage dry droppings | <i>Vishniacozyma carnescens</i>   | <i>Cryptococcus carnescens</i>      | ITS |
|                  | <i>Ardea cinerea</i>         | <b>A</b> | ND                                    | Swab on cage wet droppings | <i>Naganishia diffluens</i>       | <i>Cryptococcus diffluens</i>       | ITS |
|                  | <i>Ardea cinerea</i>         | <b>A</b> | ND                                    | Swab on cage wet droppings | <i>Naganishia uzbekistanensis</i> | <i>Cryptococcus uzbekistanensis</i> | ITS |
| Phoenicoptiforme | <i>Phoenicopterus roseus</i> | <b>A</b> | ND                                    | Swab on cage wet droppings | <i>Filobasidium chernovii</i>     | <i>Cryptococcus chernovii</i>       | ITS |
| Strigiforme      | <i>Tyto alba</i>             | <b>A</b> | ND                                    | Direct cloacal swab        | <i>Filobasidium floriforme</i>    | <i>Cryptococcus albidus</i>         | NL  |
|                  | <i>Otus scop</i>             | <b>A</b> | ND                                    | Swab on cage dry droppings | <i>Naganishia diffluens</i>       | <i>Cryptococcus diffluens</i>       | ITS |
| Suliforme        | <i>Phalacrocorax carbo</i>   | <b>A</b> | Amoxicillin + clavulanate + meloxicam | Swab on cage wet droppings | <i>Filobasidium magnum</i>        | <i>Cryptococcus magnus</i>          | ITS |

Supplementary Data S3: Detailed Distribution of rare *Cryptococcus* and former *Cryptococcus* species by bird of origin and method of sampling

A : indicates an Adult; ; J : indicates a Juvenile; I : indicates an Immature bird. ND indicates no specific clinical data. ITS indicates that sequences were obtained by ITS1-ITS4 sequencing. NL indicates that sequences were obtained by NL1-NL4 sequencing.
